# Supplementary material for: Bavachin from Psoralea corylifolia Improves Insulin-Dependent Glucose Uptake through Insulin Signaling and AMPK Activation in 3T3-L1 Adipocytes
Source: Int J Mol Sci. 2016 Apr 8;17(4):527. doi: 10.3390/ijms17040527 (PMC4848983; doi:10.3390/ijms17040527)
Supplement: Supplementary file 1 [file ijms-17-00527-s001.pdf]

# Supplementary Materials: Bavachin from *Psoralea corylifolia* Improves Insulin-Dependent Glucose Uptake through Insulin Signaling and AMPK Activation in 3T3-L1 Adipocytes

Hyejin Lee, Hua Li, Minsoo Noh and Jae-Ha Ryu

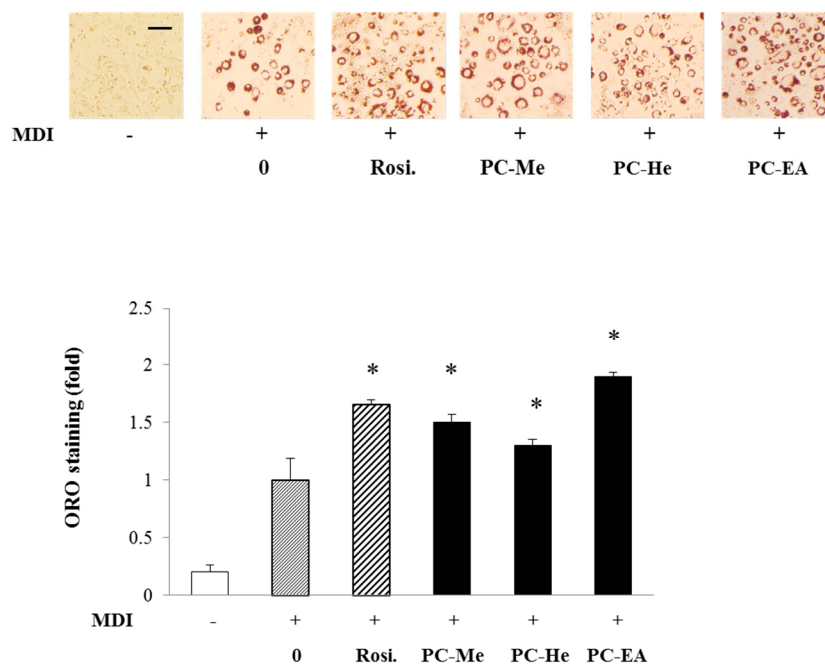

**Figure S1.** Effect of extract and fractions of *Psoralea corylifolia* (PC) on adipocyte differentiation. 3T3-L1 cells were differentiated in the presence of test materials. At differentiation Day 8 (D8), cells were stained with Oil Red-O (ORO), and lipid accumulation was quantified as described in Materials and Methods section. Scale bar = 50  $\mu$ m. Data are expressed as mean  $\pm$  standard deviation (SD). 0, MDI alone; Rosi., rosiglitazone (1  $\mu$ M); PC-Me, methanol extract; PC-He, hexane fraction; PC-EA, ethyl acetate fraction (0.5  $\mu$ g/mL each). \*  $p < 0.01$  vs. MDI.
